# Supplementary material for: Staphylococcus epidermidis Pathogenesis: Interplay of icaADBC Operon and MSCRAMMs in Biofilm Formation of Isolates from Pediatric Bacteremia in Peshawar, Pakistan
Source: MDPI journal article supplement (doi:10.3390/medicina58111510), 2022-10-24
Supplement: s1 [file s1]

Supplementary Materials

# *Staphylococcus epidermidis* Pathogenesis: Interplay of *icaADBC* Operon and MSCRAMMs in Biofilm Formation of Isolates from Pediatric Bacteremia in Peshawar, Pakistan

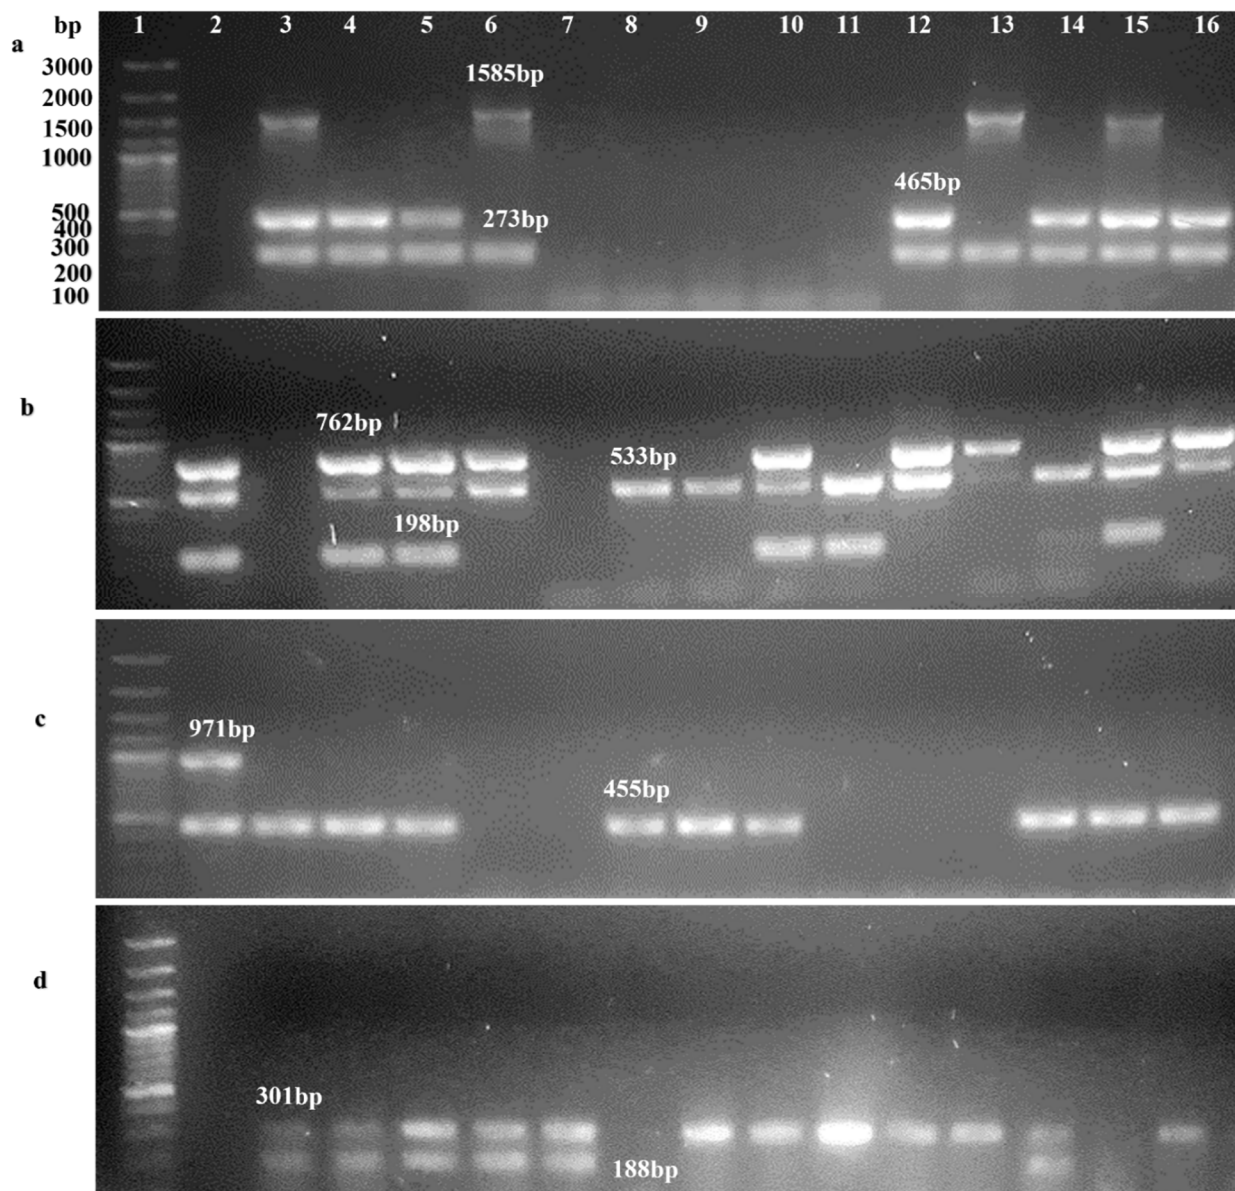

**Figure S1. Representative virulence genes profiling of *S. epidermidis*.** (a) 2: negative control, 3: positive control, *bhp* (1585bp), *aap* (465bp), *fbe* (273bp); (b) 2: positive control, 3: negative control, *IS256* (762bp), *mecA* (533bp, not part of the manuscript/intended for another publication), *icaD* (198bp); (c) 2: positive control, *bap* (971bp), *embp* (455bp). (d) *eno* (301bp), *icaA* (188bp); Multiplex PCR amplification of representative isolates. 1.5% agarose gel; 1 (100bp DNA Marker); 4-16: test isolates; Time: 110 minutes; Voltage: 75; Buffer: TAE 1X.
